# Supplementary material for: PlioMIP2 simulation with NorESM-L and NorESM1-F
Source: Copernicus journal article supplement (doi:10.5194/cp-2019-102), 2019-08-19
Supplement: Supplementary file 1 [file cp-2019-102-supplement.pdf]

# PlioMIP2 simulations with NorESM-L and NorESM1-F

Xiangyu Li<sup>1,2</sup>, Chuncheng Guo<sup>2</sup>, Zhongshi Zhang<sup>3,2,4,\*</sup>, Odd Helge Otterå<sup>2</sup>, Ran  
Zhang<sup>1</sup>

<sup>1</sup>Climate Change Research Center, Chinese Academy of Sciences, Beijing 100029, China

5 <sup>2</sup>NORCE Norwegian Research Centre, Bjerknes Centre for Climate Research, Bergen, Norway

<sup>3</sup>Department of Atmospheric Science, School of Environmental Studies, China University of  
Geosciences, Wuhan, China

<sup>4</sup>Nansen-Zhu International Research Centre, Institute of Atmospheric Physics, Chinese Academy of  
Sciences, Beijing 100029, China

10 *Correspondence to:* Zhongshi Zhang, E-mail address: zzhz@norceresearch.no

**Supplementary Figures**

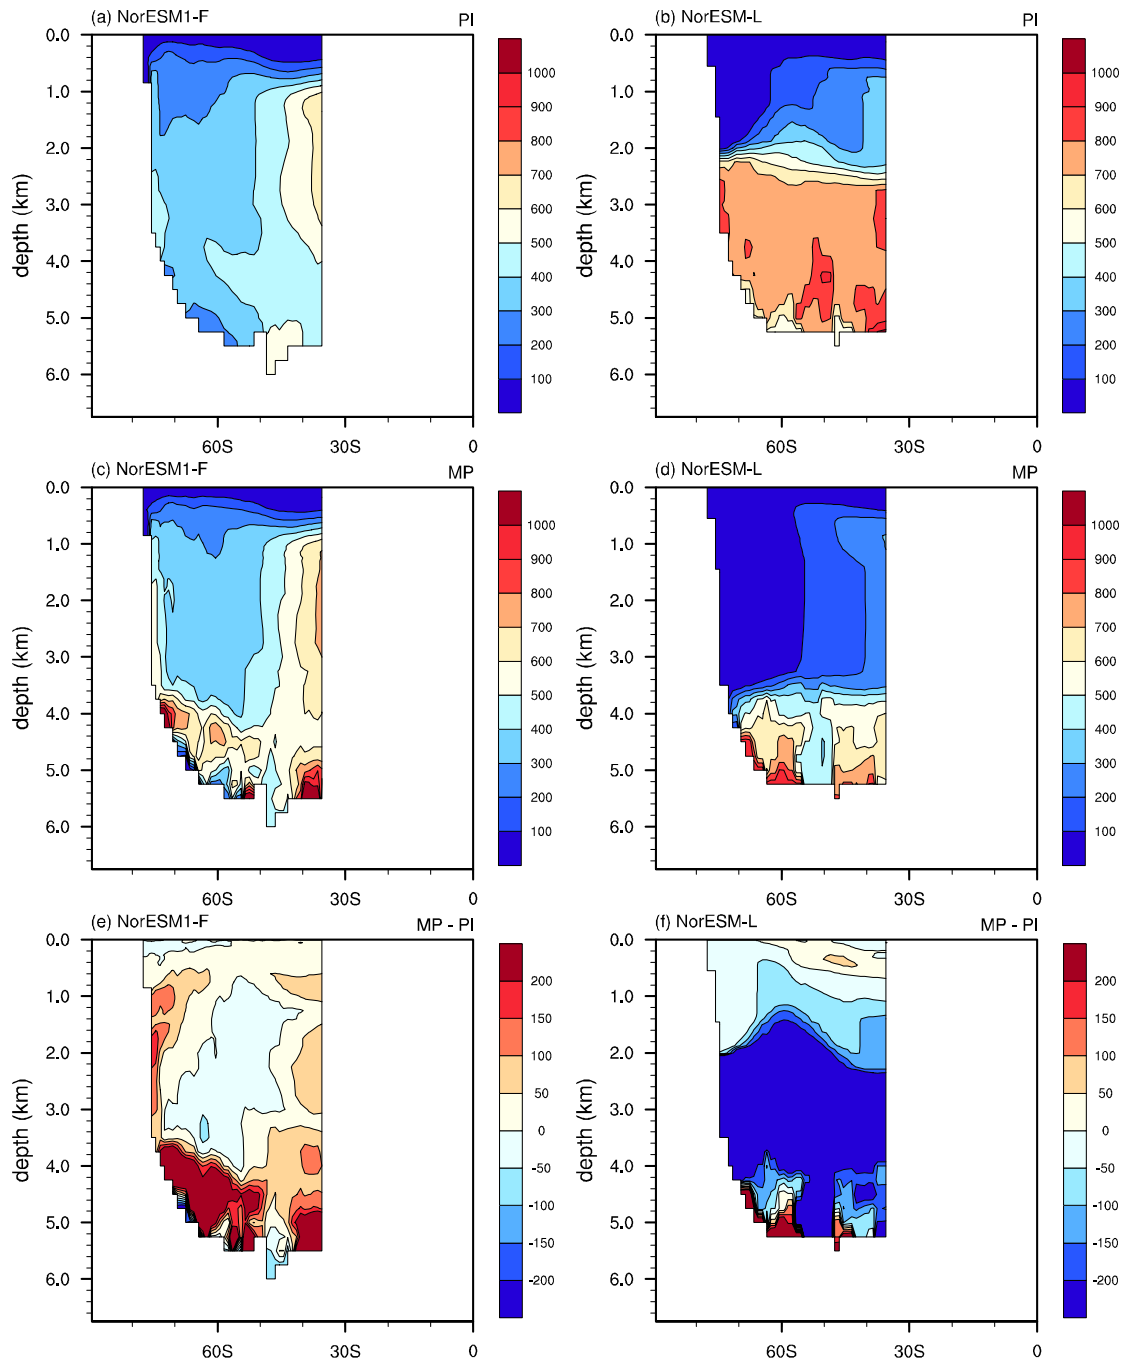

**Fig. S1. Climatological Southern Ocean ideal age (units: year) derived from the pre-industrial (a and b) and Pliocene (c and d) experiments, and their differences (e and f) according to NorESM1-F (left panel) and NorESM-L (right panel).**
